# Supplementary material
Source: PubMed Central journal article supplement (PMC3629723)

## Supplemental Information

### Figure S1, related to Figure 1

#### Breeding scheme used to produce the experimental cohorts.

5 alleles of *mTert*, *LSL-mTert<sup>L/L</sup>*, *Pten<sup>L/L</sup>*, *p53<sup>L/L</sup>*, *PB-Cre4* were used to generate the telomere intact *mTert PB-Pten/p53* mice, G3/4 telomere dysfunctional *mTert-null mice*, G3/4 telomerase reactivation on the backdrop of telomere dysfunctional *LSL-Tert* mice.

### Figure S2, related to Figure 2

#### Aggressive spread of G3/4 *LSL-mTert PB-Pten/p53* prostate tumors to spinal bones at 24 weeks of age.

(A) H&E sections of the HPIN in the anterior prostate (AP) tumors at age of 9 weeks from G0 *mTert PB-Pten/p53* (denoted as G0 *mTert*), G4 *mTert<sup>-/-</sup> PB-Pten/p53* (denoted as G4 *mTert<sup>-/-</sup>*), and G4 *LSL-mTert PB-Pten/p53* (denoted as G4 *LSL-mTert*). (B) Prostate tumor cells from the primary sites and from spinal bones of G4 *LSL-Tert PB-Pten/p53* mouse at 24 weeks of age. (C) Prostate tumor cells from spinal bones of G4 *LSL-Tert PB-Pten/p53* mouse were micro-dissected, and the purified genomic DNA was used to detect the genomic status of floxed *Pten* by PCR (D).

### Figure S3, related to Figure 3

#### Telomere reserves were significantly increased in the G4 *LSL-mTert PB-Pten/p53* sample relative to G3/4 *mTert<sup>-/-</sup> PB-Pten/p53* prostate tumor.

(A) Representative telomere fluorescence *in situ* hybridization (FISH) of prostate tumors shows severe telomere erosion in G3/4 *mTert<sup>-/-</sup> PB-Pten/p53* cells (panel b), compared to G0 *mTert PB-Pten/p53* cells (panel a). Telomeres of G4 *LSL-Tert* cells were significantly maintained (panel c), compared to G3/4 *mTert<sup>-/-</sup> PB-Pten/p53* cells. (B) Relative telomere length in prostate tumors. Error bars represent s.d. for at least 4 to 6 independent measurements for each genotype.

### Figure S4, related to Figure 4.

**Genomic alterations in both mouse and human prostate tumor cells and derivation of 113 (37 amp and 76 del) genes correlated with bone metastasis.**

There are a total of 94 MCRs in the aCGH dataset of G3/ G4 LSL-*Tert* prostate tumors (n=18). There are 741 genes (300 amp and 441 del) having the same genomic alteration pattern of amplification or deletion between the mouse prostate tumor dataset and Taylor *et al* (2010) human prostate cancer dataset (n=194). Among these 741 genes, there are a total of 228 genes (77 amp and 151 del) shown to be correlated with prostate cancer progression. Among these 228 genes, there are a total of 113 (37 amp and 76 del) genes shown to be correlated with bone metastasis.

**Figure S5, related to Figure 5**

**Prognostic potential of a 14-gene set of bone metastatic tumor-enriched genes.**

(A) Pathway enrichment analysis of bone metastasis of 113 gene set. P values were adjusted by false discovery rate (FDR). Enrichment of TGF-beta signaling pathway was highlighted by arrows. (B) The 14-gene set of ATP5A1/ATP6V1C1/CUL2/CYC1/DCC/ERCC3/MBD2/MTERF/PARD3/PTK2/RBL2/SMAD2/SMAD4/SMAD7 can dichotomize PCA cases for BCR in Taylor *et al* data set (2010). (C) The 4-gene set of PTEN/SMAD4/CCND1/SPP1 can dichotomize PCA cases for BCR. (D) The combination of the 14-gene and PTEN/SMAD4/CCND1/SPP1 gene sets increases the predictive power of either gene set alone.

**Table S1, related to Figure 2**

**Murine prostate cancer model used in this study.**

**Table S2, related to Figure 4**

Significant copy number alterations (741 genes overlap with human PCA indicated on the right).

**Table S3, related to Figure 4**

The list of 77 amplified genes are related to metastatic phenotypes in any of the 6 databases, and 151 deleted genes are related to indolent phenotypes in any of the 6 Oncomine databases. AMP, gene amplification; DEL, gene deletion; BM, bone metastasis.

**Table S4, related to Figure 5**

Pathway enrichment analysis of bone metastasis of 113 gene set. P values were adjusted by false discovery rate (FDR).

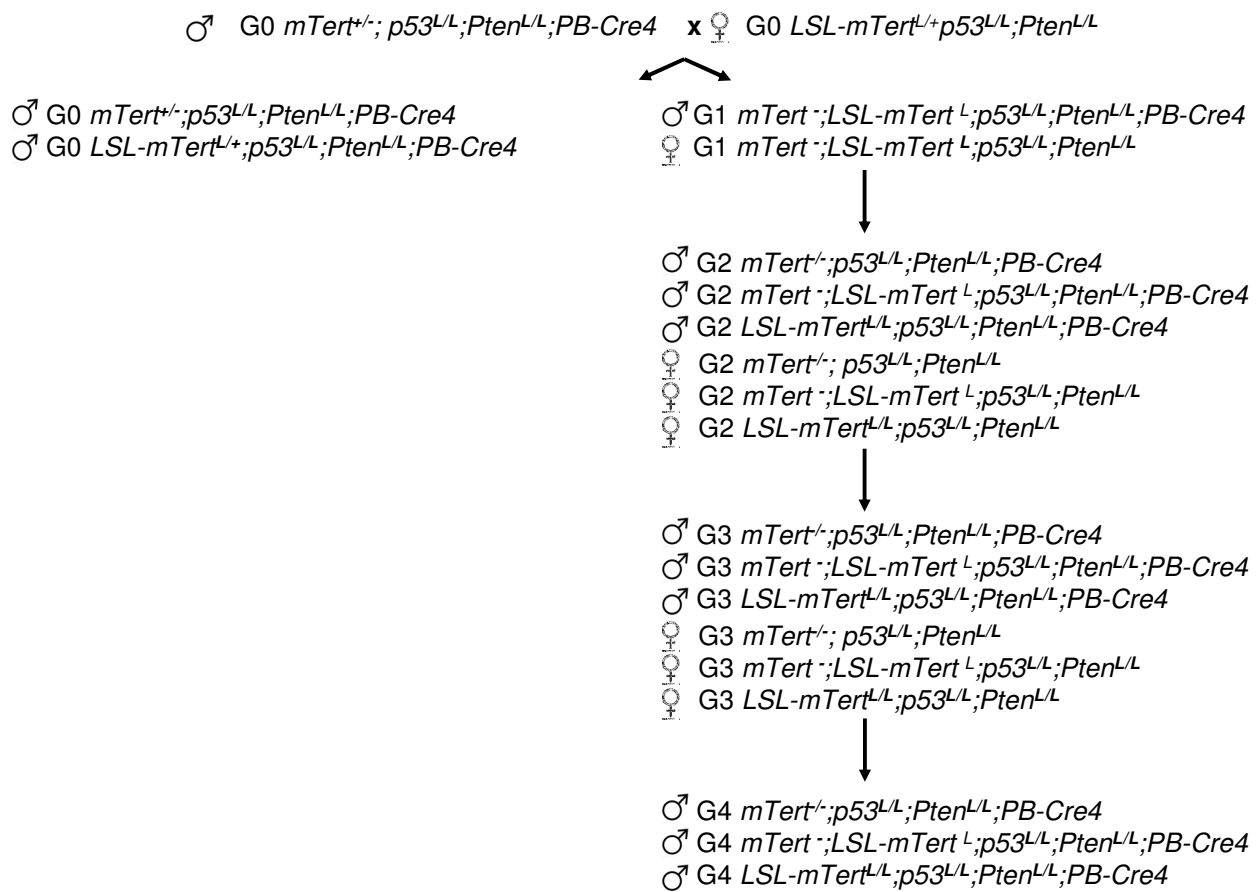



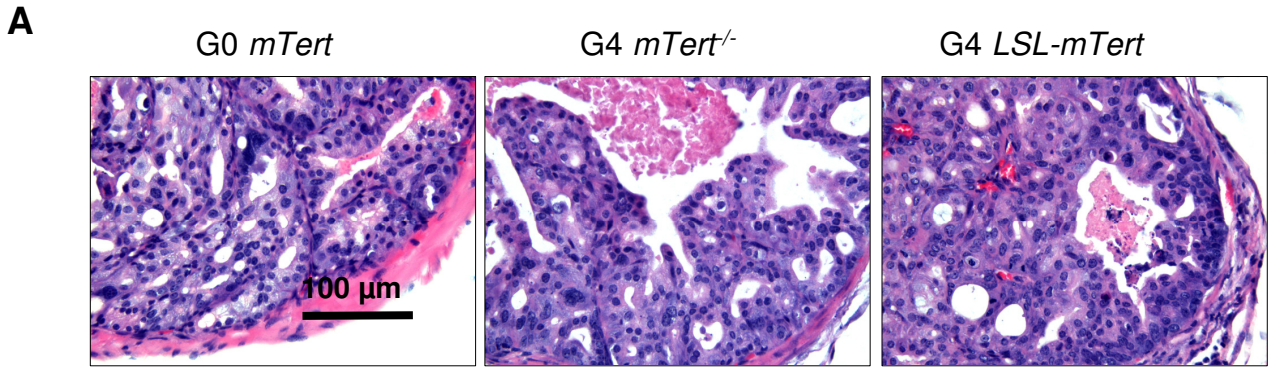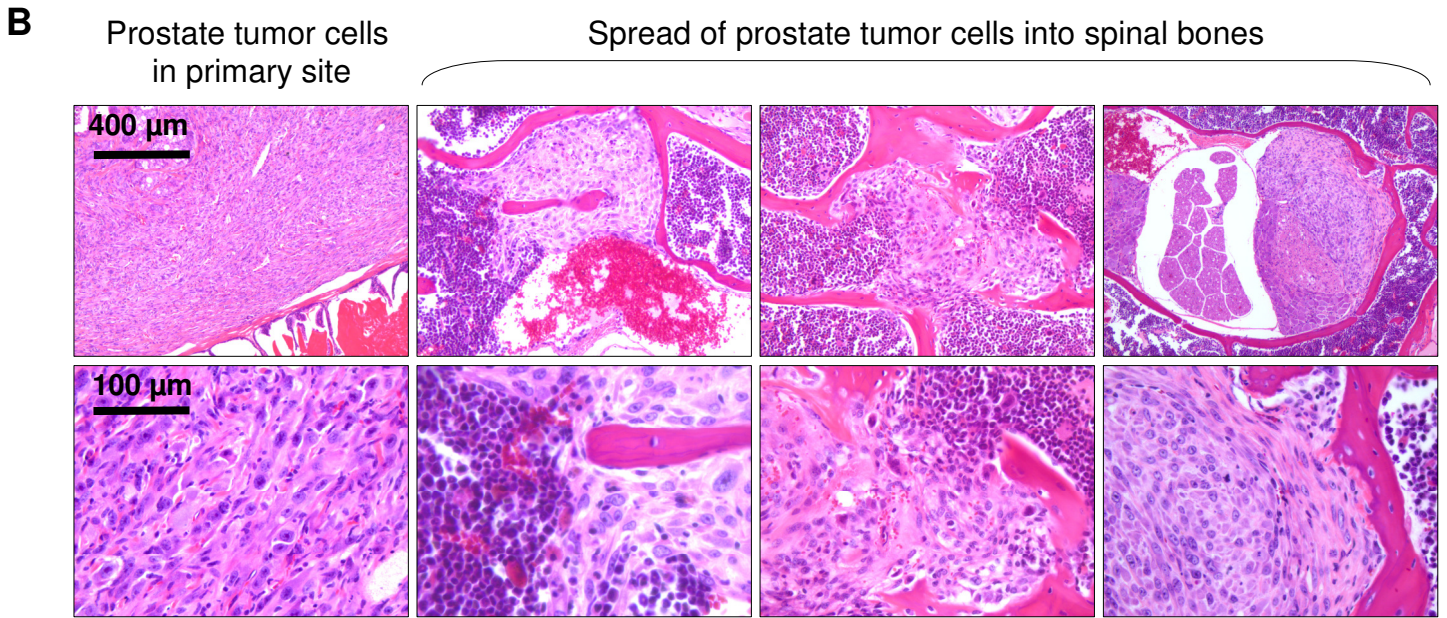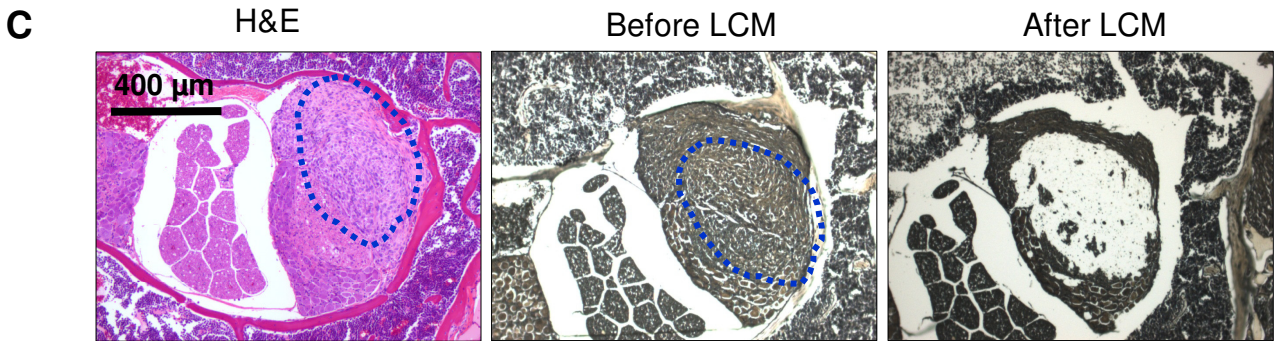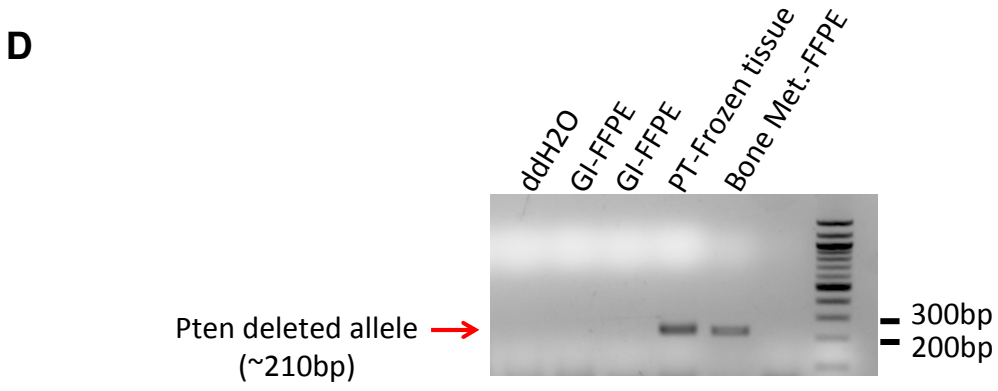

*Ding et al. Figure S2*

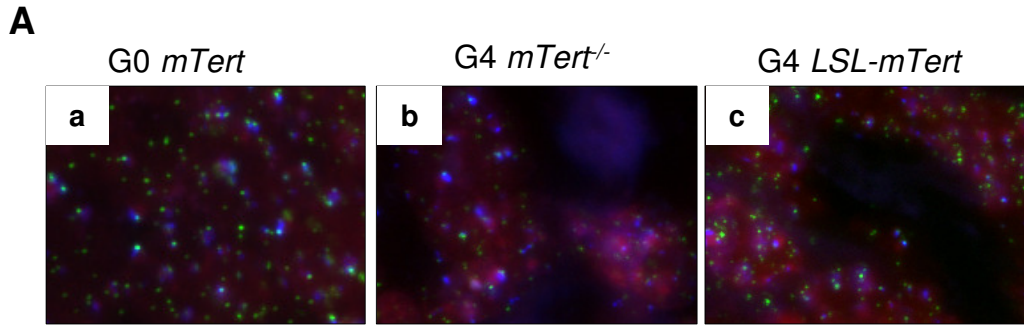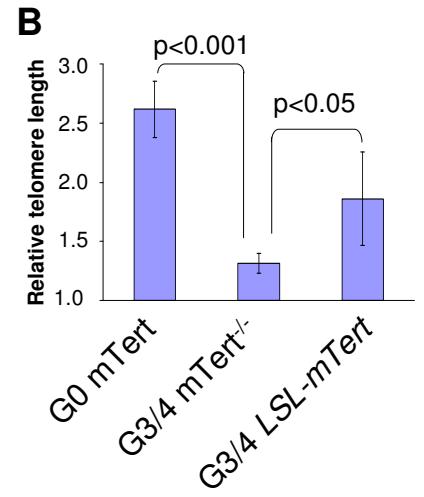

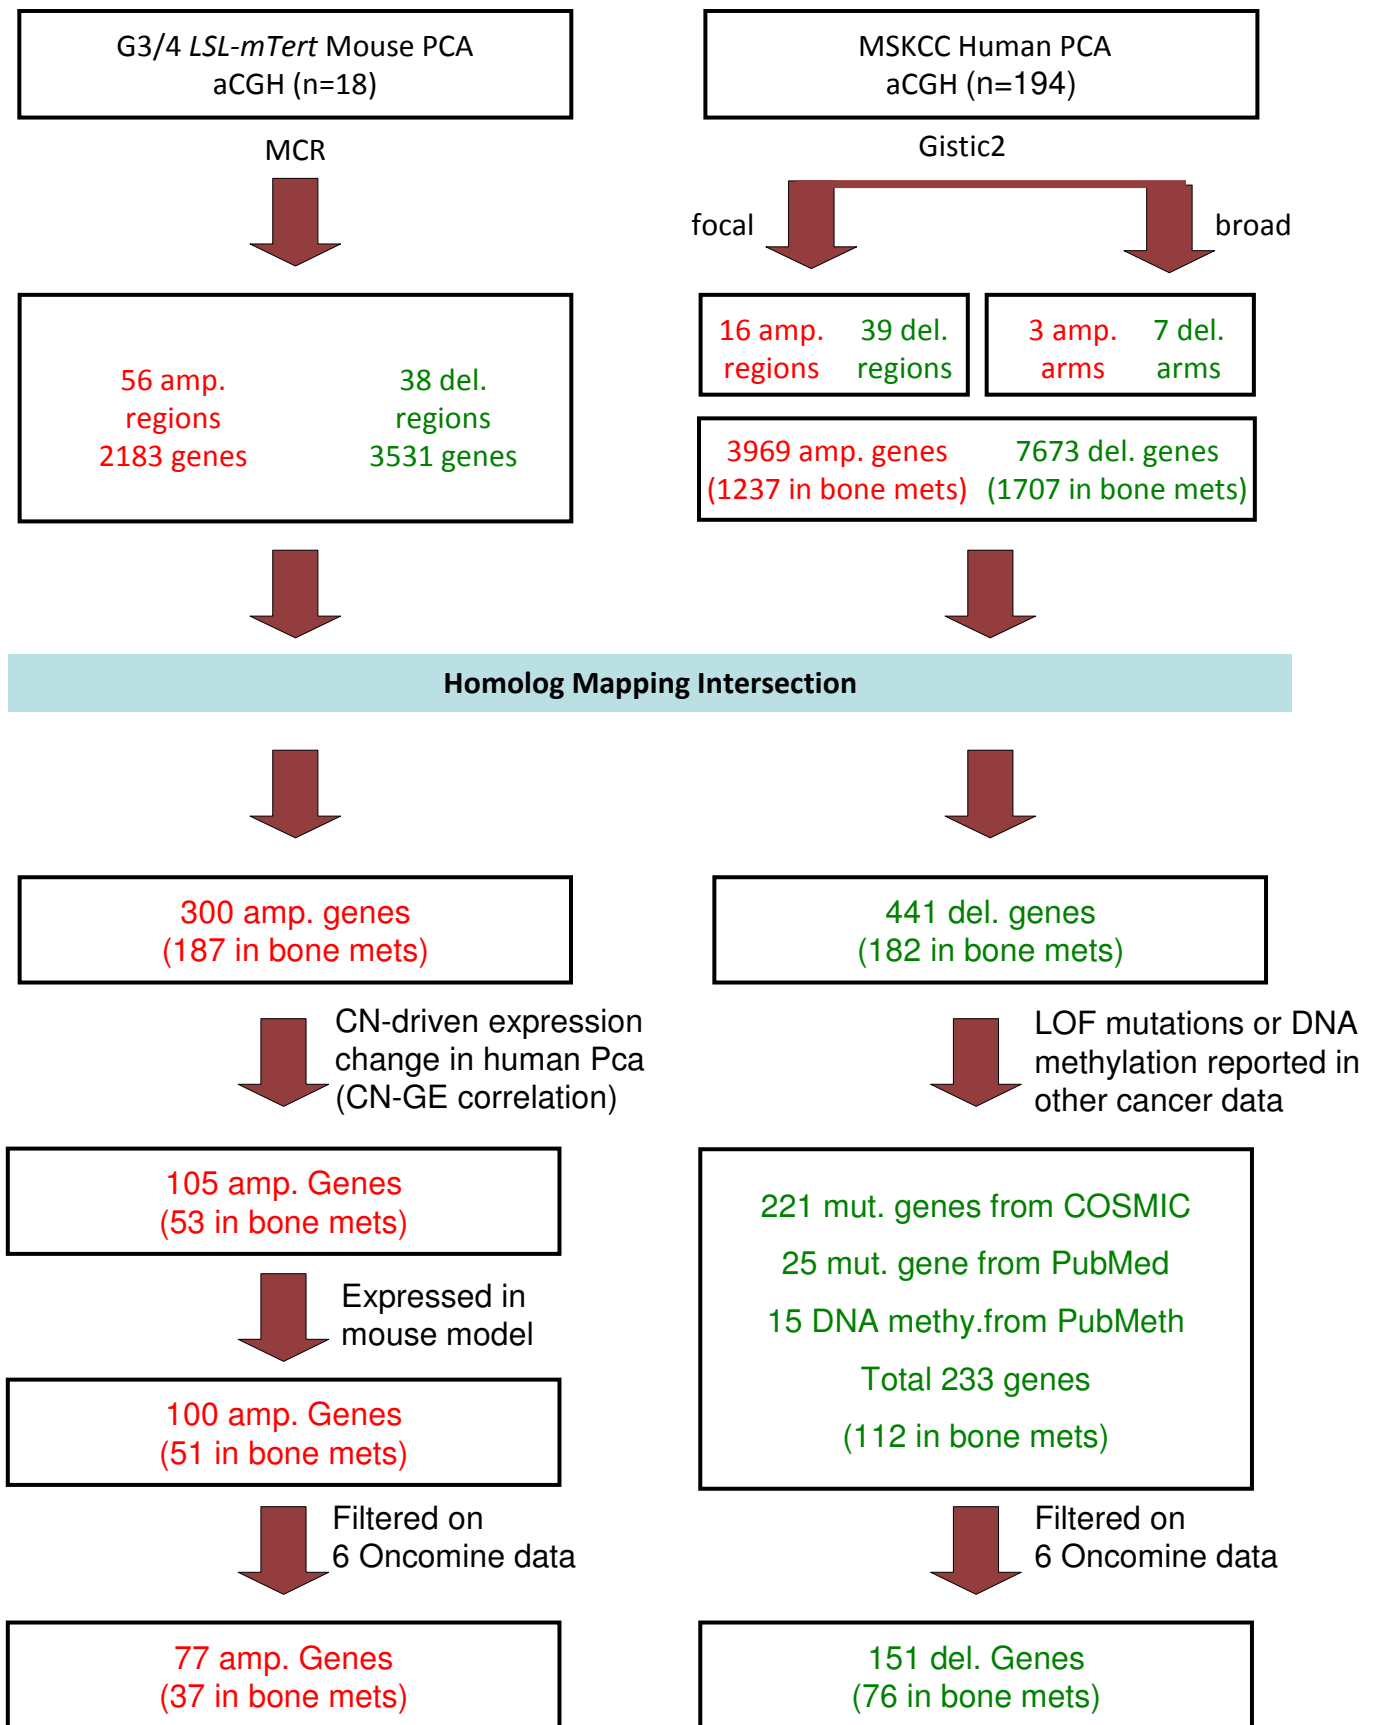

*Ding et al. Figure S4*

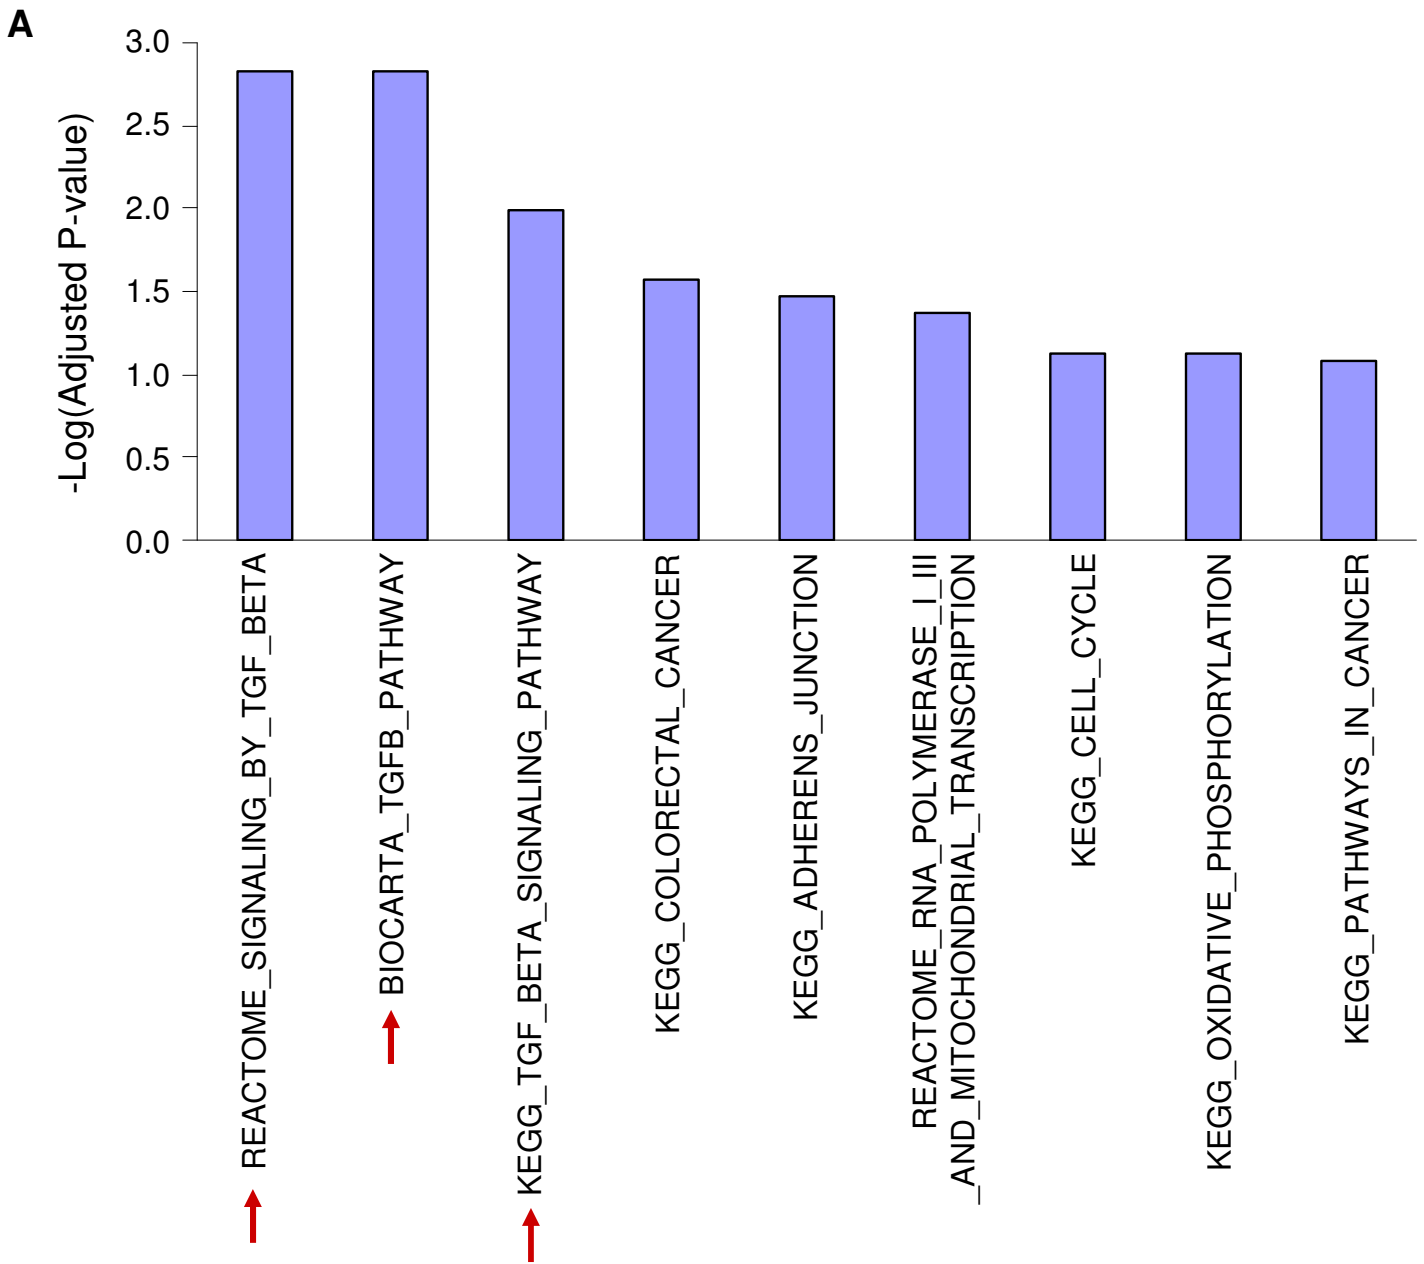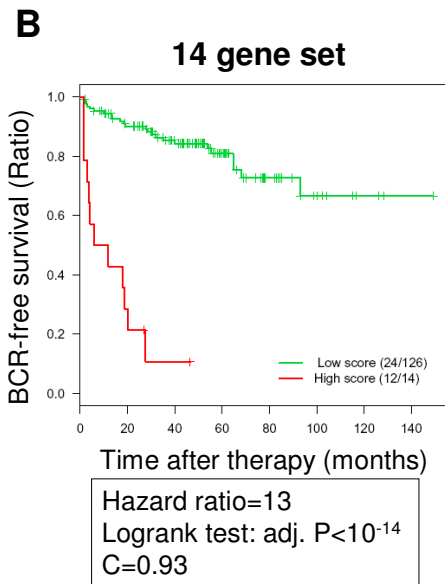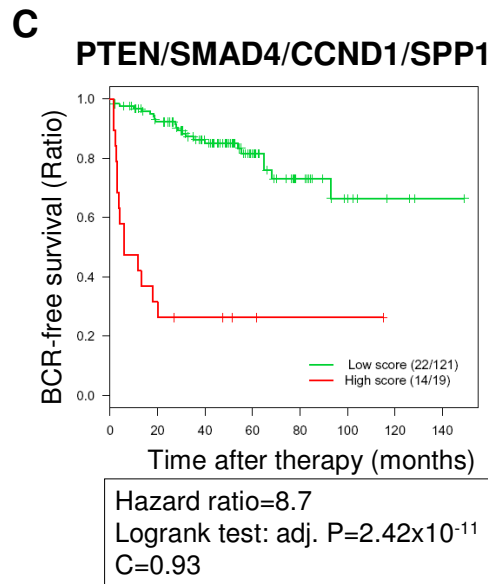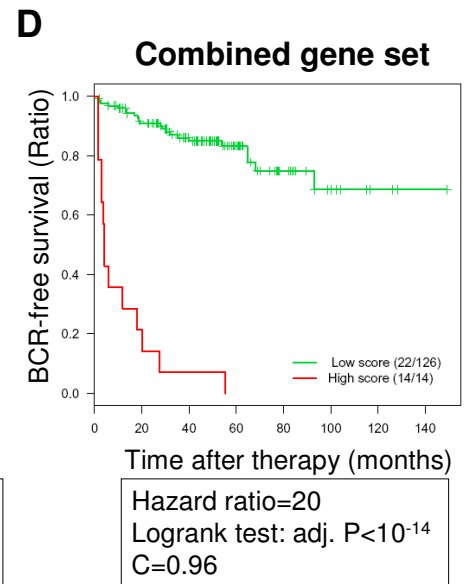

Supplement: NIHMS353368-supplement-01.pdf [file NIHMS353368-supplement-01.pdf]
